# Supplementary material
Source: PubMed Central journal article supplement (PMC6235683)
Supplement: djy041_supp.pdf [file djy041_supp.pdf]

# Smoking, Cessation, and Lung Cancer: Results of the Framingham Heart Study

## Table of Contents

|                                                                                                                                                                             |    |
|-----------------------------------------------------------------------------------------------------------------------------------------------------------------------------|----|
| <b>Investigators (authors)</b> .....                                                                                                                                        | 2  |
| <b>Supplementary Figure 1</b> Derivation of Study Sample from Framingham Heart Study Data .....                                                                             | 3  |
| <b>Supplementary Figure 2</b> Plots of Cumulative Pack-Years and Years Since Quitting in a Current and Former Smoker who Developed Lung Cancer in the Original Cohort ..... | 5  |
| <b>Supplementary Figure 3</b> Histogram of Cumulative Pack-Years among “Heavy” Former and Current Smokers with at least Median Pack-Year Exposure ( $\geq 21.3$ ) .....     | 6  |
| <b>Supplementary Table 1</b> Adjusted Risk of Lung Cancer in Heavy Former vs. Current Smokers, Additionally Adjusted for Cumulative Pack-Years .....                        | 7  |
| <b>Supplementary Table 2</b> Adjusted Risk of Lung Cancer Using 6 Assessments of Smoking Status ....                                                                        | 8  |
| <b>Supplementary Table 3</b> Adjusted Risk of Lung Cancer Using 2 Assessments of Smoking Status ....                                                                        | 9  |
| <b>Supplementary Table 4</b> Adjusted Risk of Lung Cancer in Full Sample .....                                                                                              | 10 |
| <b>Supplementary Table 5</b> Adjusted Risk of Lung Cancer in Former vs. Current Smokers with $\geq 30$ Pack-Years Exposure .....                                            | 12 |
| <b>Supplementary Table 6</b> Adjusted Risk of Lung Cancer in Former Smokers with $\geq 30$ Pack-Years Exposure vs. Never Smokers .....                                      | 14 |

**Investigators (authors)**

Tindle, Hilary A.

Duncan, Meredith S.

Greevy, Robert A.

Ramachandran, Vasana S.

Kundu, Suman

Massion, Pierre P.

Freiberg, Matthew S.

Supplementary Figure 1. Derivation of Study Sample from Framingham Heart Study Data

## Sample Derivation

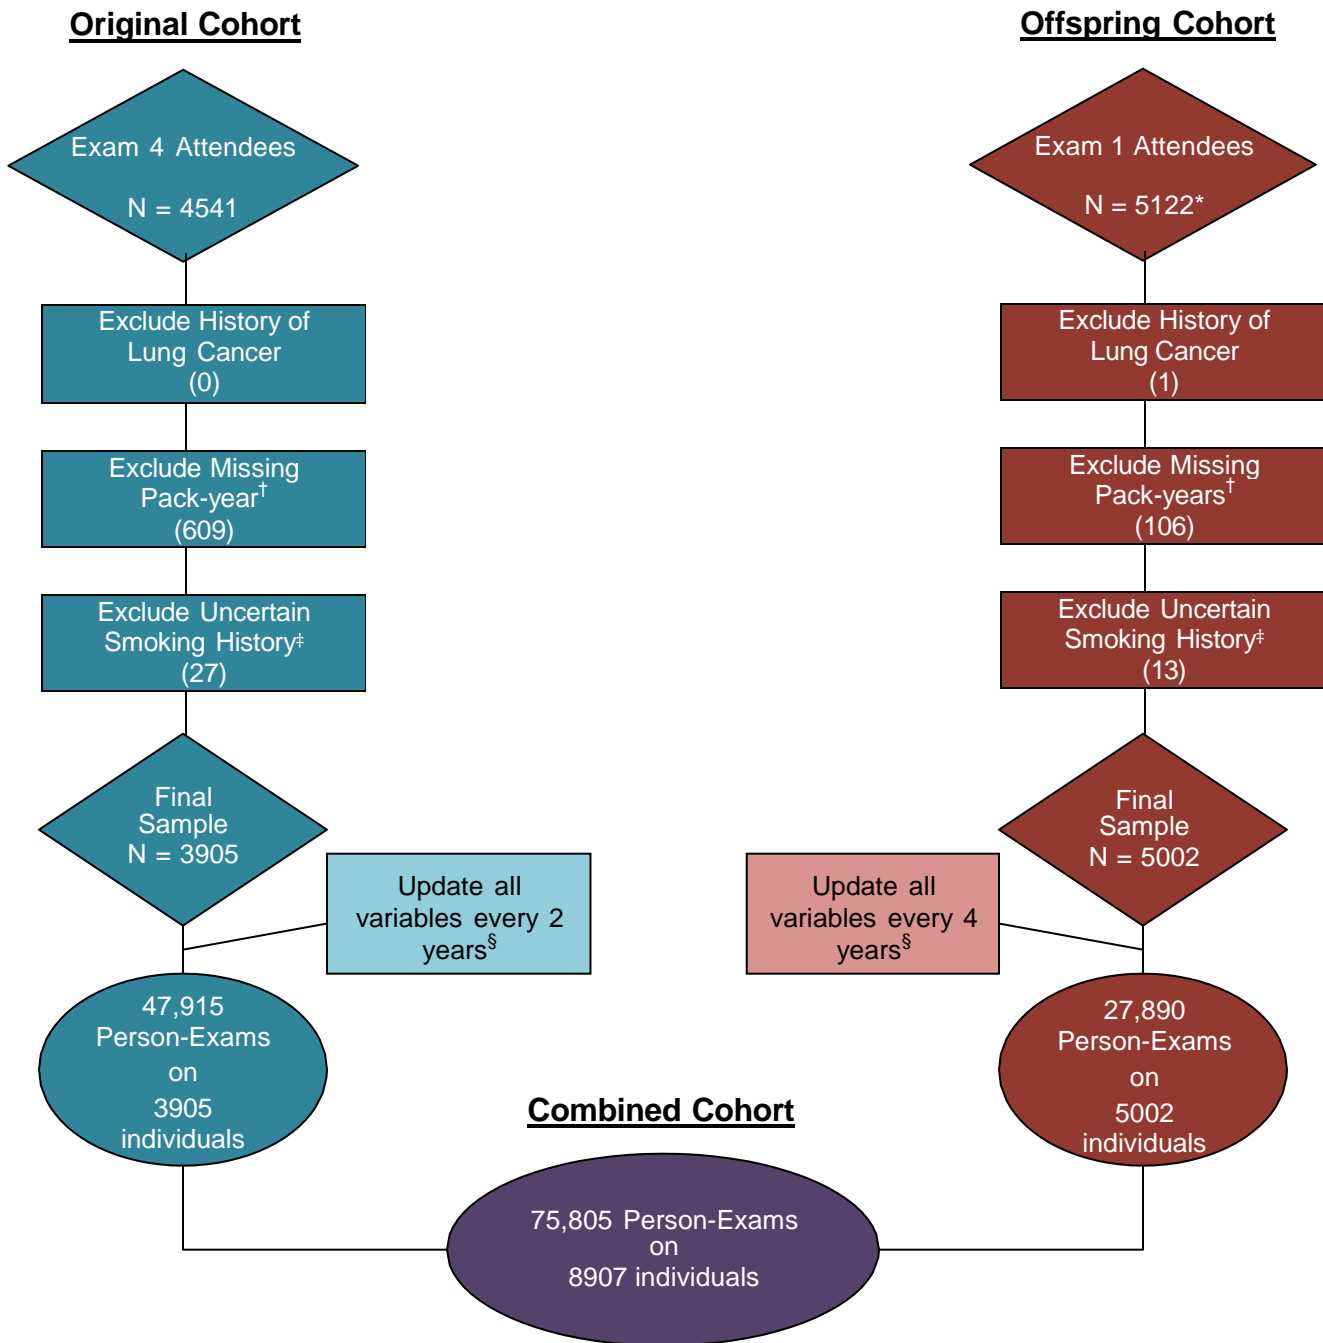

\*2 participants in the FHS Offspring cohort were considered ineligible for sample inclusion since their last follow-up date was equal to their Exam 1 date.

<sup>†</sup>In order to accurately calculate cumulative pack-years during the follow-up period, a reliable measure of prior smoking history at baseline was essential. Individuals excluded here were missing pack-years at baseline due to inability to

report age at starting/stopping smoking and/or intensity of smoking (cigarettes per day) prior to baseline.

<sup>‡</sup>This includes individuals who, at baseline, reported: being a former/current smoker but with no pack-year history; being a never smoker with >0 pack-year history; or age at quitting smoking that was older than baseline age.

<sup>§</sup>Original cohort participants were seen roughly every 2 years. After 5 years without an update (effectively one missed exam plus an additional year), individuals were censored in order to avoid carrying values forward for an extended period without reassessment. Similarly, Offspring participants were seen roughly every 4 years and were thus censored after 9 years without an update (also corresponding to a single missed exam plus an additional year).

**Supplementary Figure 2. Plot of Cumulative Pack-years and Years Since Quitting in a Current and Former Smoker who Developed Lung Cancer in the Original Cohort**

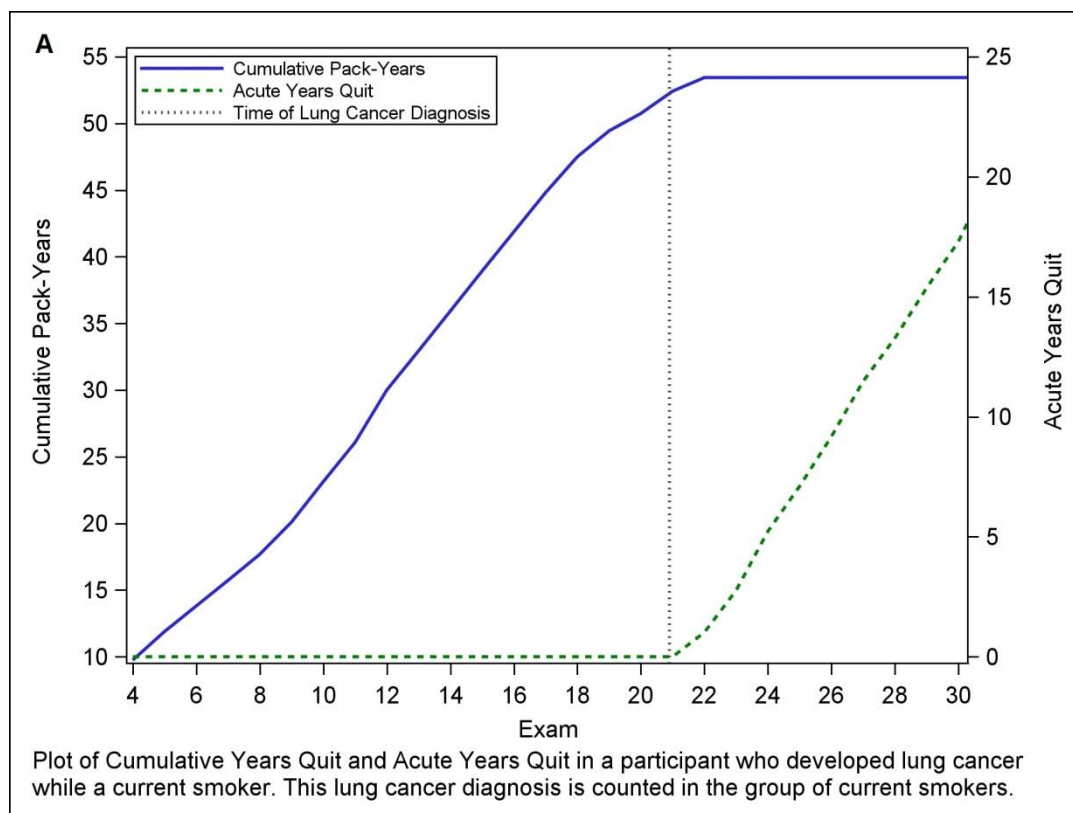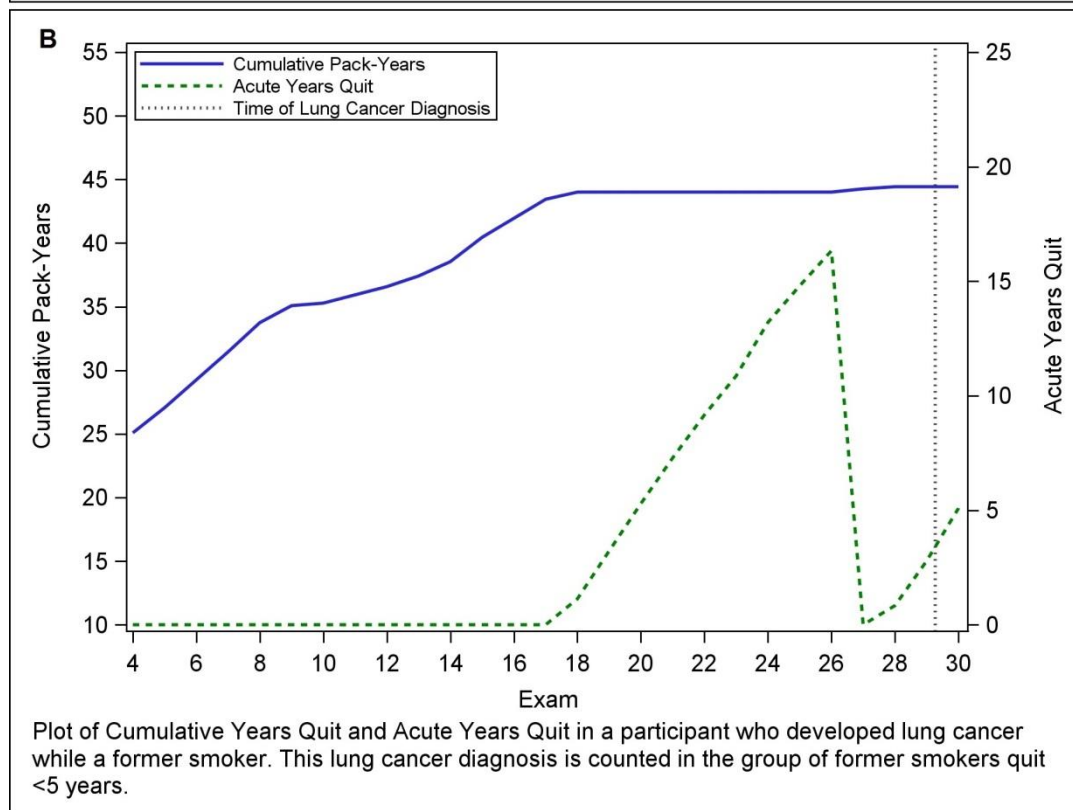

**Supplementary Figure 3. Histogram of Cumulative Pack-Years among “Heavy” Former and Current Smokers with at least Median Pack-Year Exposure ( $\geq 21.3$ )**

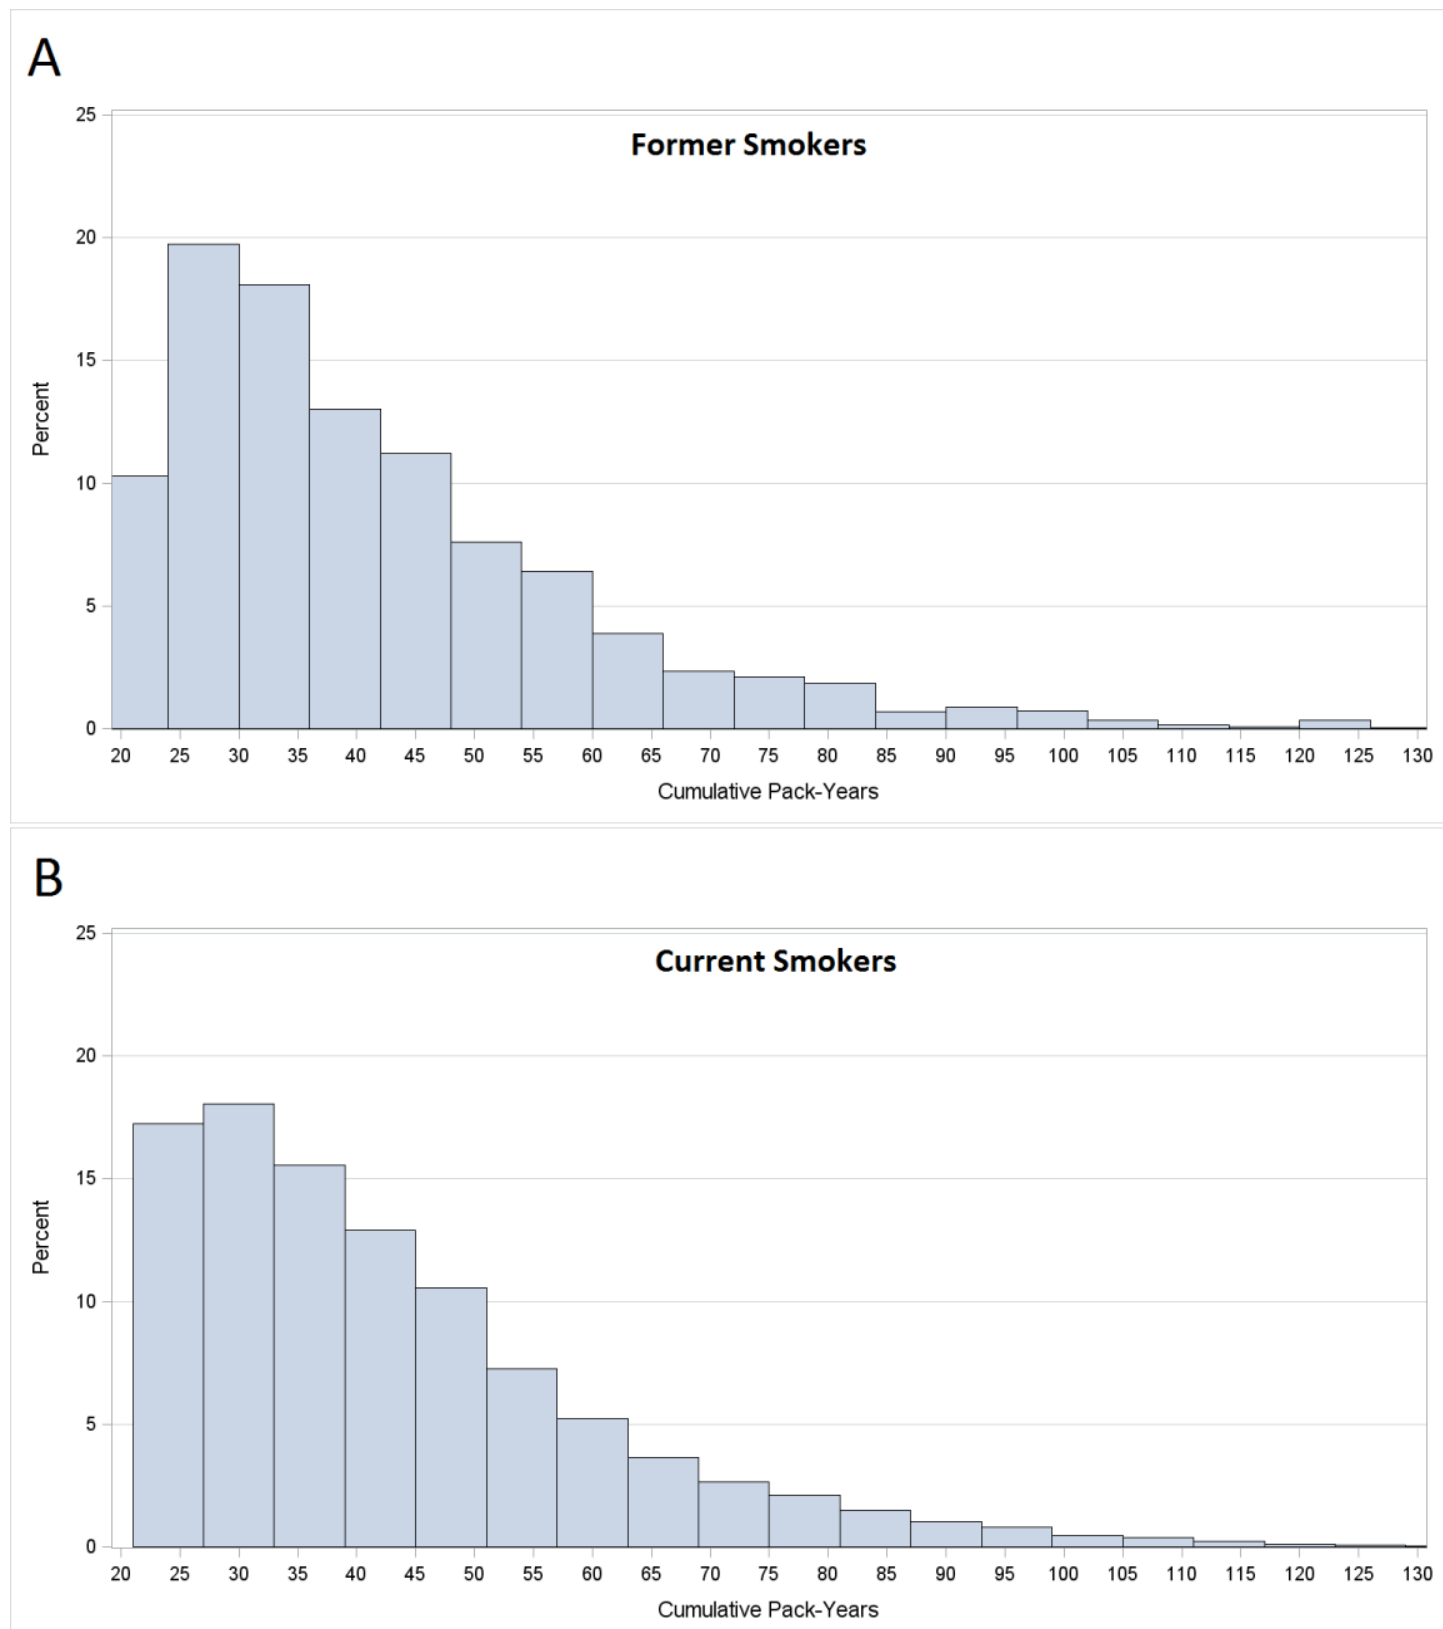

**Supplementary Table 1. Adjusted Risk of Lung Cancer in Heavy Former vs. Current Smokers, Additionally Adjusted for Cumulative Pack-Years\***

| <i>YSQ Category</i>        | <i>Person-Exams</i> | <i>Lung Cancers</i> | <i>Adjusted Hazards Ratio<sup>†</sup> [95% CI]</i> | <i>p-value<sup>‡</sup></i> |
|----------------------------|---------------------|---------------------|----------------------------------------------------|----------------------------|
| <b>Combined Cohorts</b>    |                     |                     |                                                    |                            |
| Current Smokers (referent) | 14,118              | 137                 | 1.00                                               | --                         |
| <5 YSQ                     | 2828                | 27                  | 0.67 [0.44, 1.03]                                  | 0.07                       |
| [5, 10) YSQ                | 2301                | 27                  | 0.73 [0.48, 1.09]                                  | 0.13                       |
| [10, 15) YSQ               | 1564                | 15                  | 0.52 [0.30, 0.90]                                  | 0.02                       |
| [15, 25) YSQ               | 2332                | 22                  | 0.46 [0.28, 0.77]                                  | 0.003                      |
| 25+ YSQ                    | 1459                | 12                  | 0.38 [0.20, 0.75]                                  | 0.005                      |
| <b>Original Cohort</b>     |                     |                     |                                                    |                            |
| Current Smokers (referent) | 9963                | 85                  | 1.00                                               | --                         |
| <5 YSQ                     | 1882                | 13                  | 0.54 [0.30, 0.97]                                  | 0.04                       |
| [5, 10) YSQ                | 1409                | 11                  | 0.53 [0.28, 0.98]                                  | 0.04                       |
| [10, 15) YSQ               | 951                 | 9                   | 0.56 [0.27, 1.14]                                  | 0.11                       |
| [15, 25) YSQ               | 1280                | 12                  | 0.50 [0.25, 0.97]                                  | 0.04                       |
| 25+ YSQ                    | 770                 | 7                   | 0.48 [0.21, 1.10]                                  | 0.08                       |
| <b>Offspring Cohort</b>    |                     |                     |                                                    |                            |
| Current Smokers (referent) | 4155                | 52                  | 1.00                                               | --                         |
| <5 YSQ                     | 946                 | 14                  | 0.92 [0.50, 1.68]                                  | 0.78                       |
| [5, 10) YSQ                | 892                 | 16                  | 0.98 [0.56, 1.72]                                  | 0.95                       |
| [10, 15) YSQ               | 613                 | 6                   | 0.48 [0.20, 1.13]                                  | 0.09                       |
| [15, 25) YSQ               | 1052                | 10                  | 0.43 [0.20, 0.93]                                  | 0.03                       |
| 25+ YSQ                    | 689                 | 5                   | 0.29 [0.10, 0.85]                                  | 0.02                       |

\*This analysis is limited to current and former smokers with at least 21.3 cumulative pack-years. CI=confidence interval; YSQ = Years since quitting.

<sup>†</sup>Hazards Ratios are adjusted for age, sex, education, examination decade, alcohol consumption, and cumulative pack-years. All variables are time-updated.

<sup>‡</sup>P-values were derived from a two-sided  $\chi^2$  test.

**Supplementary Table 2. Adjusted Risk of Lung Cancer Using 6 Assessments of Smoking Status\***

| <i>YSQ Category</i>                   | <i>Person-Exams</i> | <i>Lung Cancers</i> | <i>Adjusted Hazards Ratio<sup>†</sup> [95% CI]</i> | <i>p-value<sup>‡</sup></i> |
|---------------------------------------|---------------------|---------------------|----------------------------------------------------|----------------------------|
| Combined Cohorts – Former vs. Current |                     |                     |                                                    |                            |
| Current Smokers (referent)            | 6860                | 212                 | 1.00                                               | ---                        |
| <5 YSQ                                | 1380                | 34                  | 0.55 [0.38, 0.80]                                  | 0.002                      |
| [5, 10) YSQ                           | 917                 | 30                  | 0.56 [0.38, 0.83]                                  | 0.004                      |
| [10, 15) YSQ                          | 691                 | 10                  | 0.25 [0.13, 0.47]                                  | <0.001                     |
| [15, 25) YSQ                          | 1119                | 24                  | 0.32 [0.21, 0.51]                                  | <0.001                     |
| 25+ YSQ                               | 623                 | 7                   | 0.16 [0.07, 0.35]                                  | <0.001                     |
| Combined Cohorts – Former vs. Never   |                     |                     |                                                    |                            |
| <5 YSQ                                | 1380                | 34                  | 11.15 [6.64, 18.72]                                | <0.001                     |
| [5, 10) YSQ                           | 917                 | 30                  | 10.80 [6.45, 18.10]                                | <0.001                     |
| [10, 15) YSQ                          | 691                 | 10                  | 4.78 [2.26, 10.08]                                 | <0.001                     |
| [15, 25) YSQ                          | 1119                | 24                  | 5.96 [3.35, 10.62]                                 | <0.001                     |
| 25+ YSQ                               | 623                 | 7                   | 2.85 [1.17, 6.97]                                  | 0.02                       |
| Never Smokers (referent)              | 14,636              | 31                  | 1.00                                               | ---                        |

\*This analysis is limited to never smokers and ever smokers with at least 21.3 cumulative pack years. CI=confidence interval; YSQ = Years since quitting.

<sup>†</sup>. Hazards Ratios are adjusted for age, sex, education, examination decade, and alcohol consumption. All variables are time-updated.

<sup>‡</sup>P-values were derived from a two-sided  $\chi^2$  test.



**Supplementary Table 3. Adjusted Risk of Lung Cancer Using 2 Assessments of Smoking Status\***

| <i>YSQ Category</i>                   | <i>Person-Exams</i> | <i>Lung Cancers</i> | <i>Adjusted Hazards Ratio<sup>†</sup> [95% CI]</i> | <i>p-value<sup>‡</sup></i> |
|---------------------------------------|---------------------|---------------------|----------------------------------------------------|----------------------------|
| Combined Cohorts – Former vs. Current |                     |                     |                                                    |                            |
| Current Smokers (referent)            | 3284                | 256                 | 1.00                                               | ---                        |
| <5 YSQ                                | 184                 | 1                   | 0.13 [0.02, 0.96] <sup>  </sup>                    | 0.046                      |
| [5, 10) YSQ                           | 626                 | 30                  | 0.35 [0.24, 0.52]                                  | <0.001                     |
| [10, 15) YSQ                          | 128                 | 3                   | 0.18 [0.06, 0.55] <sup>  </sup>                    | 0.003                      |
| [15, 25) YSQ                          | 193                 | 9                   | 0.30 [0.15, 0.61]                                  | <0.001                     |
| 25+ YSQ                               | 29                  | 0                   | <0.01 [<0.01, <0.01] <sup>  </sup>                 | <0.001                     |
| Combined Cohorts – Former vs. Never   |                     |                     |                                                    |                            |
| Former Smokers                        |                     |                     |                                                    |                            |
| 5 YSQ                                 | 184                 | 1                   | 2.35 [0.31, 17.96] <sup>  </sup>                   | 0.41                       |
| [5, 10) YSQ                           | 626                 | 30                  | 6.04 [3.38, 10.80]                                 | <0.001                     |
| [10, 15) YSQ                          | 128                 | 3                   | 2.97 [0.88, 10.06] <sup>  </sup>                   | 0.08                       |
| [15, 25) YSQ                          | 193                 | 9                   | 5.29 [2.06, 13.55]                                 | <0.001                     |
| 25+ YSQ                               | 29                  | 0                   | <0.01 [<0.01, <0.01] <sup>  </sup>                 | <0.001                     |
| Never Smokers (referent)              | 6126                | 32                  | 1.00                                               | ---                        |

\*This analysis is limited to never smokers and ever smokers with at least 21.3 cumulative pack years. CI = Confidence Interval; YSQ = Years since quitting.

<sup>†</sup>Hazards Ratios are adjusted for age, sex, education, examination decade, and alcohol consumption. All variables are time-updated.

<sup>‡</sup>P-values were derived from a two-sided  $\chi^2$  test.

<sup>||</sup>Because fewer than 5 lung cancer events contributed to the estimation of the hazard ratios in these cells, these estimates should be interpreted with caution.

Supplementary Table 4. Adjusted Risk of Lung Cancer in Full Sample

| <i>YSQ Category</i>                   | <i>Person-Exams</i> | <i>Lung Cancers</i> | <i>Adjusted Hazards Ratio* [95% CI]</i> | <i>p-value<sup>†</sup></i> |
|---------------------------------------|---------------------|---------------------|-----------------------------------------|----------------------------|
| Combined Cohorts – Former vs. Current |                     |                     |                                         |                            |
| Current Smokers (referent)            | 22,085              | 139                 | 1.00                                    | ---                        |
| <5 YSQ                                | 5166                | 29                  | 0.54 [0.36, 0.81]                       | 0.003                      |
| [5, 10) YSQ                           | 4366                | 27                  | 0.45 [0.30, 0.67]                       | <0.001                     |
| [10, 15) YSQ                          | 3213                | 15                  | 0.27 [0.16, 0.46]                       | <0.001                     |
| [15, 25) YSQ                          | 5385                | 28                  | 0.23 [0.15, 0.34]                       | <0.001                     |
| 25+ YSQ                               | 4743                | 21                  | 0.13 [0.08, 0.22]                       | <0.001                     |
| Combined Cohorts – Former vs. Never   |                     |                     |                                         |                            |
| Former Smokers                        |                     |                     |                                         |                            |
| <5 YSQ                                | 5166                | 29                  | 8.97 [5.17, 15.57]                      | <0.001                     |
| [5, 10) YSQ                           | 4366                | 27                  | 7.32 [4.21, 12.73]                      | <0.001                     |
| [10, 15) YSQ                          | 3213                | 15                  | 4.38 [2.28, 8.42]                       | <0.001                     |
| [15, 25) YSQ                          | 5385                | 28                  | 3.59 [2.09, 6.15]                       | <0.001                     |
| 25+ YSQ                               | 4743                | 21                  | 2.04 [1.13, 3.68]                       | 0.02                       |
| Never Smokers (referent)              | 30,847              | 25                  | 1.00                                    | ---                        |

YSQ = Years since quitting.

\*Hazards Ratios are adjusted for age, sex, education, examination decade, and alcohol consumption. All variables are time-updated.

<sup>†</sup>P-values were derived from a two-sided  $\chi^2$  test.

**Supplementary Table 5. Adjusted Risk of Lung Cancer in Former vs. Current Smokers with  $\geq$  30 Pack-Years Exposure**

| <i>YSQ Category</i>        | <b>Combined Cohorts</b>  |                         |                                             |                            |
|----------------------------|--------------------------|-------------------------|---------------------------------------------|----------------------------|
|                            | <i>Person<br/>-Exams</i> | <i>Lung<br/>Cancers</i> | <i>Adjusted<br/>Hazards Ratio* [95% CI]</i> | <i>p-value<sup>†</sup></i> |
| <b>Combined Cohorts</b>    |                          |                         |                                             |                            |
| Current Smokers (referent) | 10,402                   | 130                     | 1.00                                        | --                         |
| <5 YSQ                     | 2123                     | 26                      | 0.64 [0.42, 0.99]                           | 0.04                       |
| [5, 10) YSQ                | 1681                     | 27                      | 0.68 [0.45, 1.02]                           | 0.06                       |
| [10, 15) YSQ               | 1113                     | 13                      | 0.40 [0.22, 0.72]                           | 0.002                      |
| [15, 25) YSQ               | 1568                     | 16                      | 0.28 [0.16, 0.49]                           | <0.001                     |
| 25+ YSQ                    | 850                      | 7                       | 0.19 [0.08, 0.43]                           | <0.001                     |
| <b>Original Cohort</b>     |                          |                         |                                             |                            |
| Current Smokers (referent) | 7283                     | 79                      | 1.00                                        | --                         |
| <5 YSQ                     | 1405                     | 13                      | 0.53 [0.29, 0.97]                           | 0.04                       |
| [5, 10) YSQ                | 1021                     | 11                      | 0.50 [0.27, 0.93]                           | 0.03                       |
| [10, 15) YSQ               | 677                      | 8                       | 0.45 [0.21, 0.95]                           | 0.04                       |
| [15, 25) YSQ               | 850                      | 10                      | 0.35 [0.17, 0.71]                           | 0.004                      |
| 25+ YSQ                    | 439                      | 3                       | 0.19 [0.06, 0.61] <sup>‡</sup>              | 0.006                      |
| <b>Offspring Cohort</b>    |                          |                         |                                             |                            |
| Current Smokers (referent) | 3119                     | 51                      | 1.00                                        | --                         |
| <5 YSQ                     | 718                      | 13                      | 0.80 [0.43, 1.50]                           | 0.49                       |
| [5, 10) YSQ                | 660                      | 16                      | 0.89 [0.50, 1.57]                           | 0.68                       |
| [10, 15) YSQ               | 436                      | 5                       | 0.34 [0.13, 0.88]                           | 0.03                       |
| [15, 25) YSQ               | 718                      | 6                       | 0.20 [0.08, 0.50]                           | <0.001                     |
| 25+ YSQ                    | 411                      | 4                       | 0.18 [0.06, 0.54] <sup>‡</sup>              | 0.002                      |

YSQ = Years since quitting.

\*Hazards Ratios are adjusted for age, sex, education, examination decade, and alcohol consumption. All variables are time-updated.

<sup>†</sup>P-values were derived from a two-sided  $\chi^2$  test.

<sup>‡</sup>Because fewer than 5 lung cancer events contributed to the estimation of the hazard ratios in these cells, these estimates should be interpreted with caution.

**Supplementary Table 6. Adjusted Risk of Lung Cancer in Former Smokers with  $\geq 30$  Pack-Years Exposure vs. Never Smokers**

| <i>YSQ Category</i>      | <i>Person-Exams</i> | <i>Lung Cancers</i> | <i>Adjusted Hazard Ratio* [95% CI]</i> | <i>p-value<sup>†</sup></i> |
|--------------------------|---------------------|---------------------|----------------------------------------|----------------------------|
| Combined Cohorts         |                     |                     |                                        |                            |
| <5 YSQ                   | 2123                | 26                  | 13.86 [7.85, 24.46]                    | <0.001                     |
| [5, 10) YSQ              | 1681                | 27                  | 14.82 [8.45, 25.98]                    | <0.001                     |
| [10, 15) YSQ             | 1113                | 13                  | 8.77 [4.25, 18.10]                     | <0.001                     |
| [15, 25) YSQ             | 1568                | 16                  | 6.02 [3.07, 11.81]                     | <0.001                     |
| 25+ YSQ                  | 850                 | 7                   | 3.97 [1.60, 9.87]                      | 0.003                      |
| Never Smokers (referent) | 30,847              | 25                  | 1.00                                   | --                         |
| Original Cohort          |                     |                     |                                        |                            |
| <5 YSQ                   | 1405                | 13                  | 14.70 [6.86, 31.49]                    | <0.001                     |
| [5, 10) YSQ              | 1021                | 11                  | 14.13 [6.20, 32.23]                    | <0.001                     |
| [10, 15) YSQ             | 677                 | 8                   | 12.74 [4.78, 33.94]                    | <0.001                     |
| [15, 25) YSQ             | 850                 | 10                  | 9.91 [4.05, 24.27]                     | <0.001                     |
| 25+ YSQ                  | 439                 | 3                   | 5.25 [1.41, 19.48] <sup>‡</sup>        | 0.01                       |
| Never Smokers (referent) | 20,384              | 13                  | 1.00                                   | --                         |
| Offspring Cohort         |                     |                     |                                        |                            |
| <5 YSQ                   | 718                 | 13                  | 12.70 [5.42, 29.74]                    | <0.001                     |
| [5, 10) YSQ              | 660                 | 16                  | 14.54 [6.56, 32.21]                    | <0.001                     |
| [10, 15) YSQ             | 436                 | 5                   | 5.88 [1.97, 17.57]                     | 0.002                      |
| [15, 25) YSQ             | 718                 | 6                   | 3.49 [1.23, 9.87]                      | 0.02                       |
| 25+ YSQ                  | 411                 | 4                   | 3.32 [0.996, 11.08] <sup>‡</sup>       | 0.05                       |
| Never Smokers (referent) | 10,463              | 12                  | 1.00                                   | --                         |

YSQ = Years since quitting.

\*Hazard Ratios are adjusted for age, sex, education, examination decade, and alcohol consumption.

All variables are time-updated.

<sup>†</sup>P-values were derived from a two-sided  $\chi^2$  test.

<sup>‡</sup>Because fewer than 5 lung cancer events contributed to the estimation of the hazard ratios in these cells, these estimates should be interpreted with caution.
